# Supplementary material
Source: ML conference proceedings conference paper supplement (https://openreview.net/forum?id=qZB7KDN4L1)

# Training Data Generation

(a) Generate caption and tags:

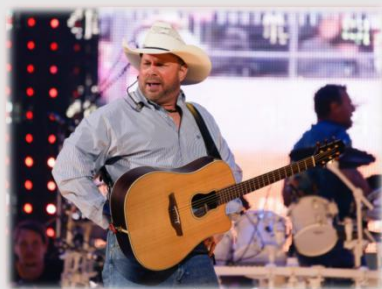

BLIP2

“a **man** in a cowboy **hat** and **jeans** is holding an acoustic **guitar**”

Spacy

(b) Generate boxes and masks:

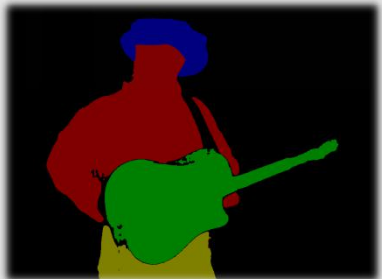

Grounding DINO  
+ SAM

**man**

**hat**

**jeans**

**guitar**

(c) Compose structured data:

**Caption:**

a **man** in a cowboy **hat** and **jeans** is holding an acoustic **guitar**

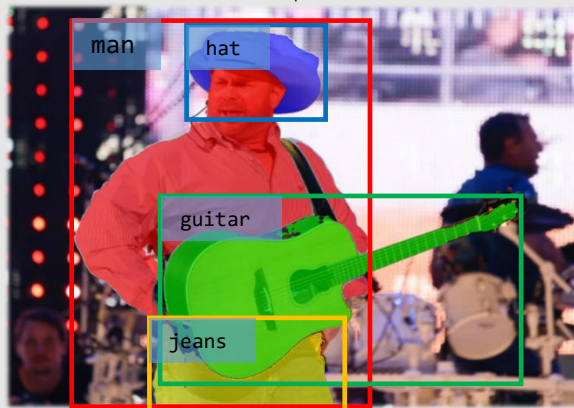

Supplement: supplementary_material [file attachment]
