# Supplementary material
Source: ML conference proceedings conference paper supplement (https://openreview.net/forum?id=qZB7KDN4L1)
Supplement: supplementary_material [file attachment]

## Single Subject Generation

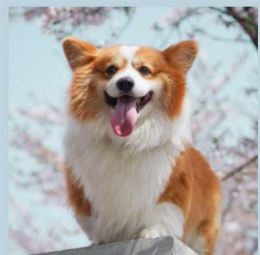

Input Image

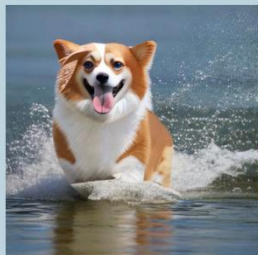

runing on water

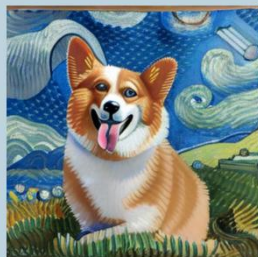

painting by Van  
Gogh

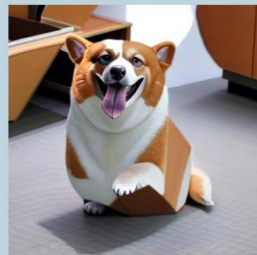

cube shaped

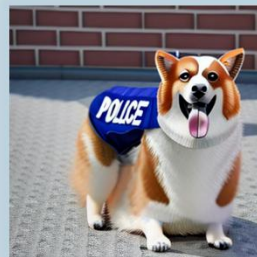

in police outfit

## Multi Subject Generation

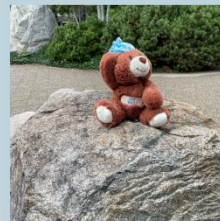

Input Image

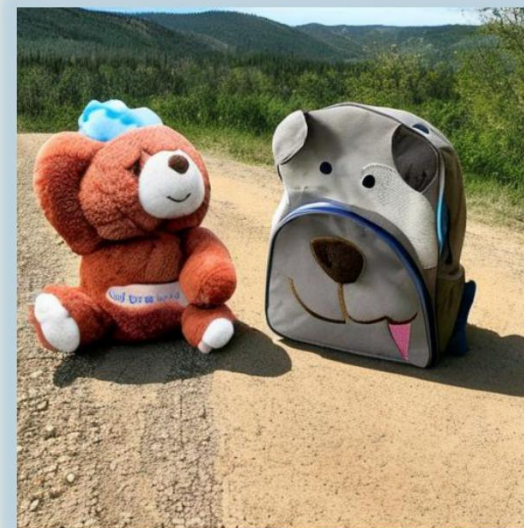

on dirt road

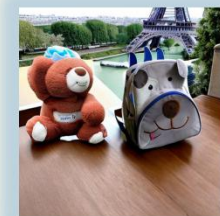

with Eiffel Tower

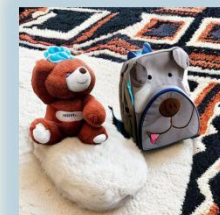

in the snow

## Human Subject Generation

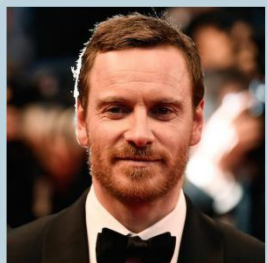

Input Image

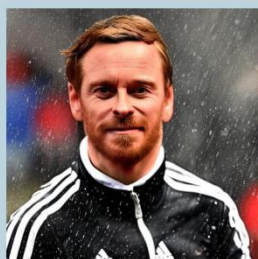

in the rain

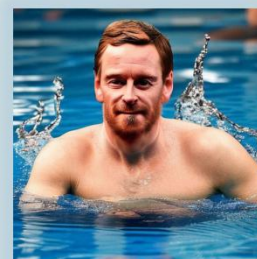

swimming

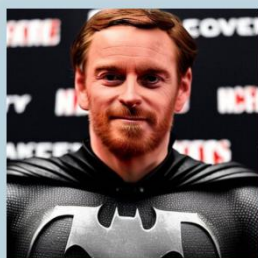

in batman suit

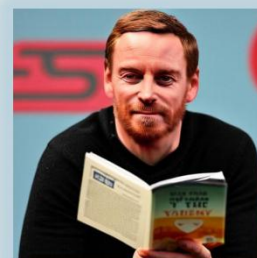

reading book

## Text-Image Interpolation

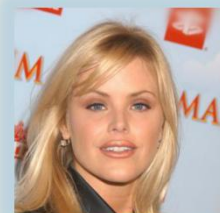

Input Image

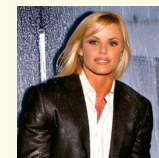

woman

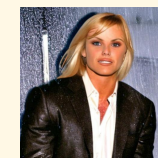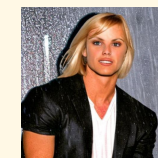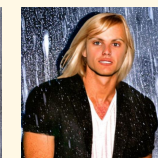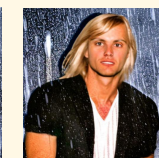

man

a woman in the rain

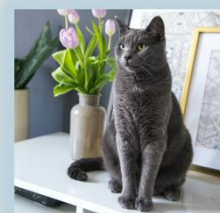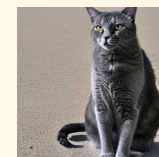

cat

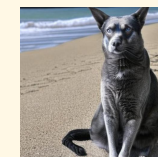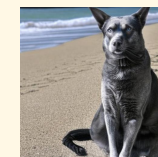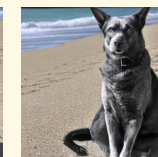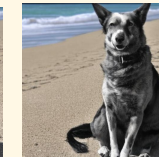

dog

a cat on the beach
